# Supplementary material for: Ross Procedure Versus Mechanical Versus Bioprosthetic Aortic Valve Replacement: A Network Meta‐Analysis
Source: PubMed Central journal article supplement — J Am Heart Assoc. 2022 Dec 24;12(1):e027715. doi: 10.1161/JAHA.122.027715 (PMC9973571; doi:10.1161/jaha.122.027715), 2022-12-24

# **Supplemental Material**

**Table S1. Definition of each outcome.**

| Author     | Year | Major bleeding                                                                                                         | Stroke                                                               | Reintervention                                                    |
|------------|------|------------------------------------------------------------------------------------------------------------------------|----------------------------------------------------------------------|-------------------------------------------------------------------|
| Doss       | 2005 | Bleeding requiring hospitalization                                                                                     | Stroke                                                               | Any operation involving the aortic and/or pulmonary valves        |
| El-Hamamsy | 2010 | N/A                                                                                                                    | Stroke                                                               | Any operation involving the aortic and/or pulmonary valves        |
| Mokhles    | 2011 | Bleeding requiring transfusion, surgical or endoscopic intervention, or inpatient care or causing long-term impairment | N/A                                                                  | N/A                                                               |
| Mazine     | 2016 | Bleeding leading to death or stroke or requiring hospitalization and/or transfusion                                    | Stroke and transient ischemic attack                                 | Any surgical or percutaneous reintervention on any operated valve |
| Sharabiani | 2016 | N/A                                                                                                                    | N/A                                                                  | N/A                                                               |
| Bouhout    | 2017 | N/A                                                                                                                    | N/A                                                                  | N/A                                                               |
| Buratto    | 2018 | N/A                                                                                                                    | N/A                                                                  | N/A                                                               |
| Gofus      | 2022 | N/A                                                                                                                    | N/A                                                                  | Any operation involving the aortic and/or pulmonary valves        |
| El-Hamamsy | 2022 | Bleeding which required inpatient                                                                                      | Hemorrhagic or ischemic stroke.                                      | Any operation involving the aortic and/or pulmonary valves        |
| Mazine     | 2022 | N/A                                                                                                                    | Stroke, transient ischemic attack, and noncerebral systemic embolism | Any surgical or percutaneous reintervention on any operated valve |

N/A=not applicable.

**Table S2. Inclusion age criteria and exclusion criteria.**

| Author     | Year | Age (yrs) | Exclusion criteria                                                                                                                                                                                                                                  |
|------------|------|-----------|-----------------------------------------------------------------------------------------------------------------------------------------------------------------------------------------------------------------------------------------------------|
| Doss       | 2005 | 18-55     | Patients with isolated or predominant aortic regurgitation, previous valve surgeries, concomitant valve procedures, active endocarditis, emergency procedures, and a history of myocardial infarction, and severe calcification of the aortic root. |
| El-Hamamsy | 2010 | 18-69     | Patients with Marfan's syndrome, rheumatoid arthritis, Reiter's syndrome.                                                                                                                                                                           |

|            |      |       |                                                                                                                                                                                                                              |
|------------|------|-------|------------------------------------------------------------------------------------------------------------------------------------------------------------------------------------------------------------------------------|
| Mokhles    | 2011 | 18-60 | Patients with an urgent operation, aortic dissection or aortic aneurysm, concomitant mitral valve replacement.                                                                                                               |
| Mazine     | 2016 | 16-63 | Patients with acute aortic dissection, active endocarditis, or requiring emergency surgery                                                                                                                                   |
| Sharabiani | 2016 | 16-40 | Patients with complex heart abnormalities, rheumatic fever, unclassified aortic valve procedures.                                                                                                                            |
| Bouhout    | 2017 | 18-65 | Patients with concomitant procedures other than ascending aortic replacement, redo operations, or urgent surgery                                                                                                             |
| Buratto    | 2018 | 18-65 | Patients with urgent surgery, concomitant cardiovascular procedures, aortic dissection, or endocarditis.                                                                                                                     |
| Gofus      | 2022 | 18-60 | Patients with concomitant procedure, acute aortic syndrome and in a critical preoperative state (those in need of artificial ventilation, catecholamines, cardiopulmonary resuscitation or in cardiogenic shock).            |
| El-Hamamsy | 2022 | 18-50 | Patients with concomitant valve surgery or coronary artery bypass grafting, end-stage renal disease, intravenous drug use, acute aortic dissection, infective endocarditis, history of carcinoid disease or Marfan syndrome. |
| Mazine     | 2022 | 16-60 | Patients with active endocarditis, acute aortic dissection, end-stage renal disease, or emergency surgery.                                                                                                                   |

**Table S3. Variables used in propensity-score matching studies.**

| Author  | Year | Variables                                                                                                                                                                                                                                                                                                                                                                                                                                                                                                                                                                                                                                                                                                                                                               |
|---------|------|-------------------------------------------------------------------------------------------------------------------------------------------------------------------------------------------------------------------------------------------------------------------------------------------------------------------------------------------------------------------------------------------------------------------------------------------------------------------------------------------------------------------------------------------------------------------------------------------------------------------------------------------------------------------------------------------------------------------------------------------------------------------------|
| Mokhles | 2011 | Age, sex, pathology, endocarditis, hemodynamic manifestation, preoperative NYHA grade, creatinine, preoperative rhythm, diabetes, hypertension, lung disease, LVEF, LVEDO, LVESD, previous cardiac operation, concomitant surgery.                                                                                                                                                                                                                                                                                                                                                                                                                                                                                                                                      |
| Mazine  | 2016 | Age, sex, residential location, year of surgery, body weight and body surface area, preoperative creatinine level, diabetes control (if applicable), history of cardiac intervention (i.e. previous aortic/mitral valve surgery, any other cardiac surgery, non-surgical intervention), clinical presentation (i.e. congestive heart failure, severe angina pectoris, left ventricular ejection fraction, results of stress testing and NYHA functional classification) 10. presence of cardiovascular risk factors (i.e. diabetes mellitus, hypertension, hyperlipidemia and smoking history) 11. presence of other associated diseases (i.e. chronic obstructive pulmonary disease, previous stroke or transient ischemic attack, peripheral vascular disease, atrial |

|            |      |                                                                                                                                                                                                                                                                                                                                                                                                                                                                                                                                                                                                                                                             |
|------------|------|-------------------------------------------------------------------------------------------------------------------------------------------------------------------------------------------------------------------------------------------------------------------------------------------------------------------------------------------------------------------------------------------------------------------------------------------------------------------------------------------------------------------------------------------------------------------------------------------------------------------------------------------------------------|
|            |      | fibrillation, complete heart block) 12. pre-operative use of medications (i.e. statin or aspirin within 7 days before the surgery) 13. disease characteristics (i.e. aortic valve pathology, presence of ascending aortic disease, mitral valve disease and coronary artery disease 14. concomitant procedures                                                                                                                                                                                                                                                                                                                                              |
| Sharabiani | 2016 | Age, sex, aortic disease type, mitral disease, coarctation, subaortic stenosis, genetic syndrome, mitral valve procedure, coarctation repair, and subaortic stenosis repair at index                                                                                                                                                                                                                                                                                                                                                                                                                                                                        |
| Bouhout    | 2017 | Age, ascending aorta aneurysm, aortic root aneurysm, NYHA functional class, hypertension, pulmonary hypertension, surgical indication for AVR, left ventricle ejection fraction <50% and dyslipidemia.                                                                                                                                                                                                                                                                                                                                                                                                                                                      |
| Buratto    | 2018 | Age, sex, era of surgery, hypertension, diabetes mellitus, cerebrovascular disease, peripheral vascular disease, chronic obstructive pulmonary disease, myocardial infarction, dialysis, New York Heart Association functional class, ejection fraction <45%, aortic stenosis, aortic regurgitation, mixed aortic valve disease, reoperation, congestive heart failure.                                                                                                                                                                                                                                                                                     |
| Gofus      | 2022 | Age, sex, body mass index, creatinine, LVEF, angina pectoris, NYHA class, heart failure, previous heart surgery, smoking status, diabetes, hypertension, dyslipidemia, chronic pulmonary disease, rhythm, cerebral vascular disease, coronary artery disease, endocarditis, urgent surgery, valve pathology, concomitant procedures                                                                                                                                                                                                                                                                                                                         |
| El-Hamamsy | 2022 | Age, sex, race, history of hypertension, diabetes, congestive heart failure, chronic kidney disease, coronary artery disease, atrial fibrillation, peripheral vascular disease, chronic obstructive pulmonary disease, liver disease, cancer, cerebrovascular disease, coagulation disorders, previous endocarditis), and admission year.                                                                                                                                                                                                                                                                                                                   |
| Mazine     | 2022 | Age, sex, year of surgery, weight, body surface area, preoperative diabetes, congestive heart failure, angina, severe chronic obstructive pulmonary disease, hypertension, medically treated hyperlipidemia, previous stroke or transient ischemic attack, atrial fibrillation or complete heart block preoperatively, ascending aortic disease, use of aspirin or statins within 7 days before surgery, concurrent coronary artery bypass grafting, concurrent mitral and/or tricuspid valve procedure, and history of cardiac intervention (ie, previous aortic or mitral valve surgery, any other cardiac surgery, or nonsurgical cardiac intervention). |

**Table S4. Quality assessment based on NOS (range, 1-9). NOS score  $\geq 8$  is low risk, 6-7 is moderate risk and  $\leq 5$  is high risk.**

| Studies    | Representativeness of exposed cohort | Selection of nonexposed cohort | Ascertainment of exposure | Absence of outcome at start of study | Comparability of cohorts | Outcome assessment | Length of follow-up | Adequacy of follow-up | NOS score |
|------------|--------------------------------------|--------------------------------|---------------------------|--------------------------------------|--------------------------|--------------------|---------------------|-----------------------|-----------|
| Mokhles    | 1                                    | 0                              | 1                         | 1                                    | 2                        | 1                  | 1                   | 1                     | 8         |
| Mazine     | 1                                    | 1                              | 1                         | 1                                    | 2                        | 1                  | 1                   | 1                     | 9         |
| Sharabiani | 1                                    | 1                              | 1                         | 1                                    | 2                        | 1                  | 1                   | 1                     | 9         |
| Bouhout    | 1                                    | 1                              | 1                         | 1                                    | 2                        | 1                  | 0                   | 1                     | 8         |
| Buratto    | 1                                    | 0                              | 1                         | 1                                    | 2                        | 1                  | 1                   | 1                     | 8         |
| Gofus      | 1                                    | 1                              | 1                         | 1                                    | 2                        | 1                  | 1                   | 1                     | 9         |
| El-Hamamsy | 1                                    | 1                              | 1                         | 1                                    | 2                        | 1                  | 1                   | 1                     | 9         |
| Mazine     | 1                                    | 1                              | 1                         | 1                                    | 2                        | 1                  | 1                   | 1                     | 9         |

---

NOS=Newcastle-Ottawa Scale

**Figure S1. Preferred Reporting Items for Systematic Reviews and Meta-Analyses (PRISMA) flow diagram.**

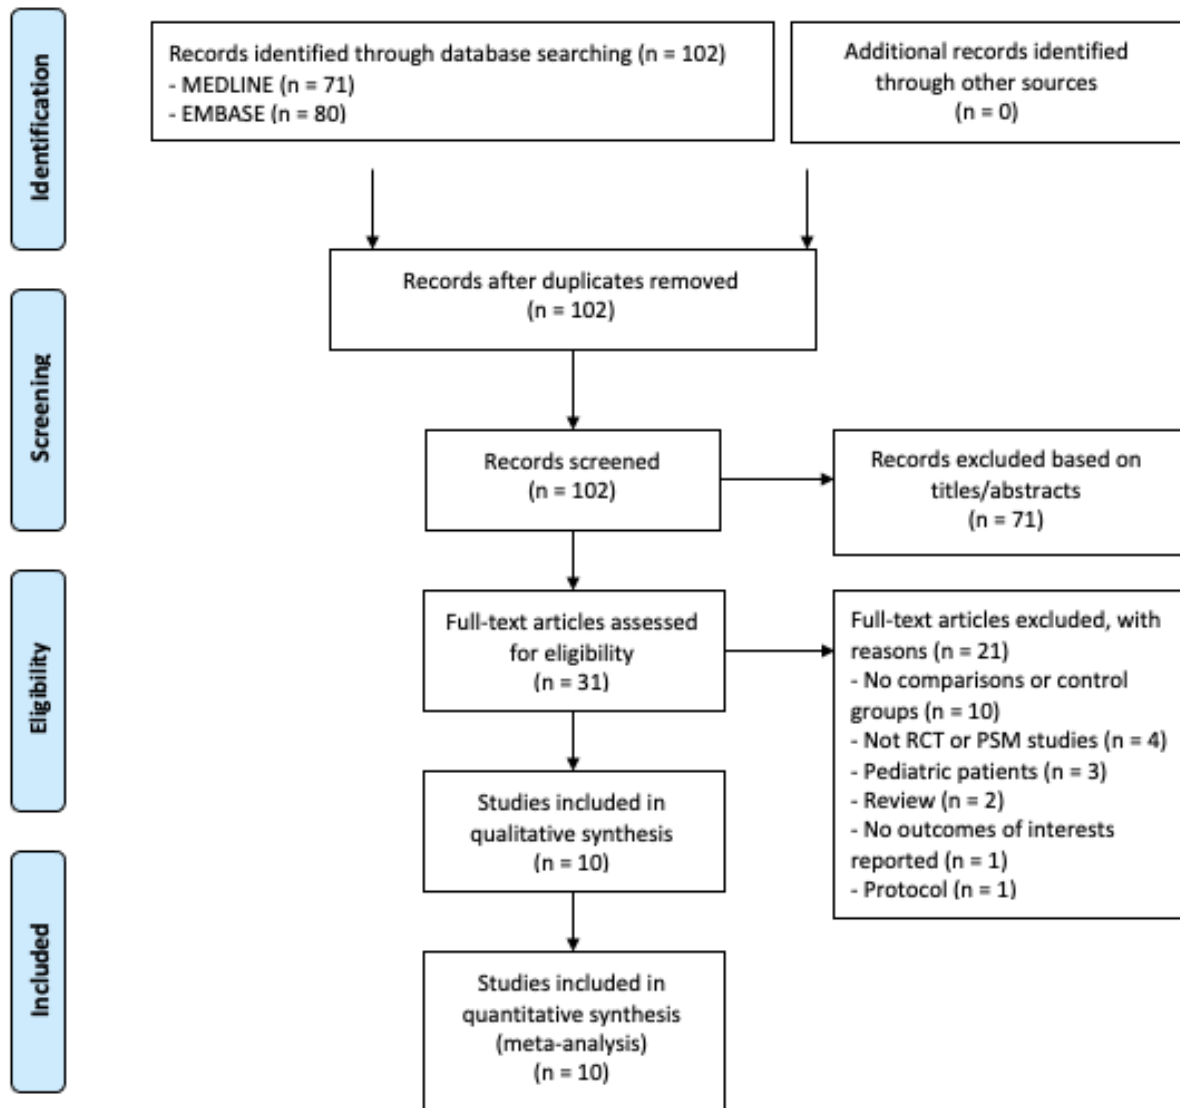

RCT, randomized controlled trial; PSM, propensity-score-matched

Figure S2. Risk of bias summary according to the Cochrane Collaboration Manual.

Yellow: unclear risk; Green: low risk, Red: high risk.

|                 | Random sequence generation (selection bias)                                         | Allocation concealment (selection bias)                                             | Blinding of participants and personnel (performance bias)                           | Blinding of outcome assessment (detection bias)                                     | Incomplete outcome data (attrition bias)                                            | Selective reporting (reporting bias)                                                |
|-----------------|-------------------------------------------------------------------------------------|-------------------------------------------------------------------------------------|-------------------------------------------------------------------------------------|-------------------------------------------------------------------------------------|-------------------------------------------------------------------------------------|-------------------------------------------------------------------------------------|
| Doss 2005       |  |  |  |  |  |  |
| El-Hamamsy 2010 |  |  |  |  |  |  |

**Figure S3. Forest plots of A) stroke, B) myocardial infarction, C) new onset atrial fibrillation, and D) reoperation for bleeding all-cause mortality among treatment strategies (random-effects model). The horizontal lines represent the values within the 95% confidence interval of the underlying effects. The vertical line indicates an incident hazard ratio of 1. B-AVR=bioprosthetic aortic valve replacement, CI=confidence interval, HR=hazard ratio, M-AVR=mechanical aortic valve replacement.**

A)

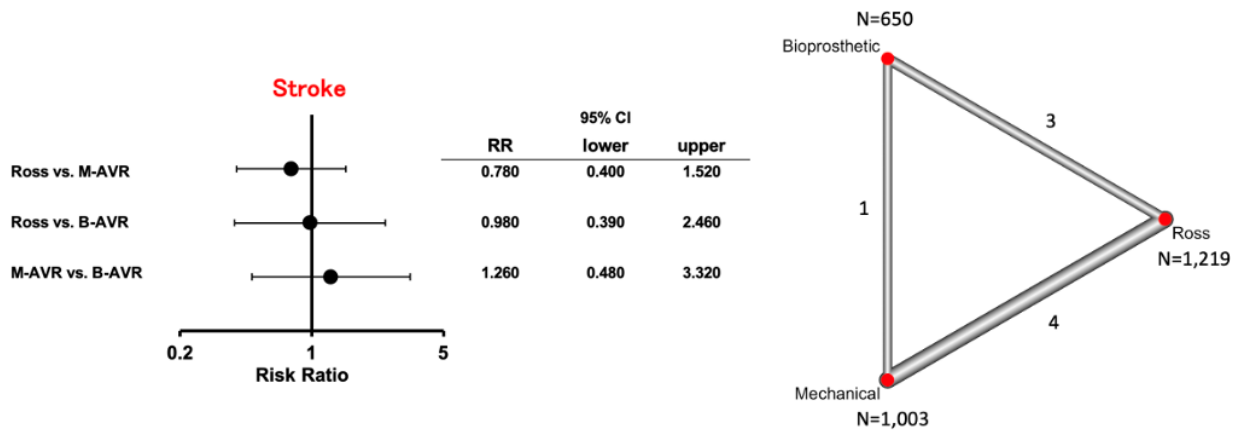

B)

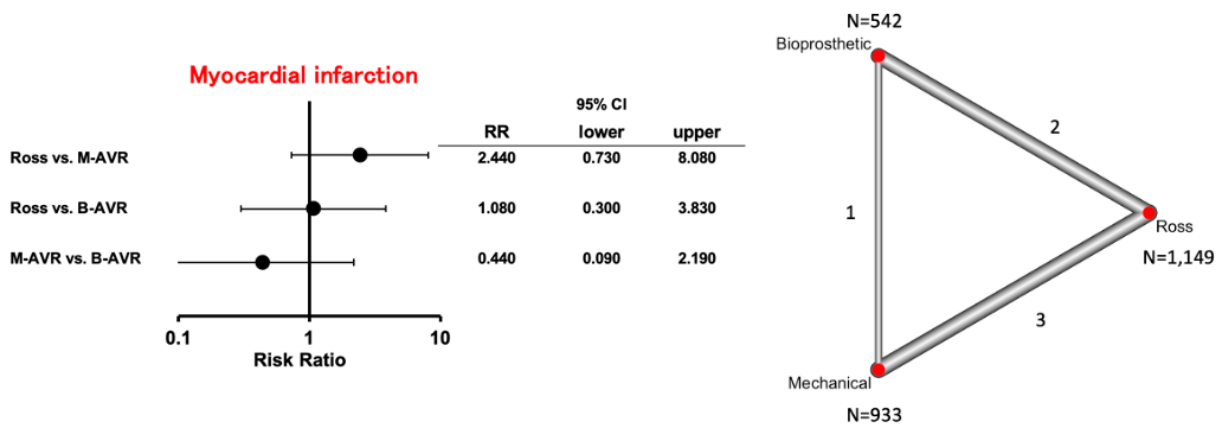

C)



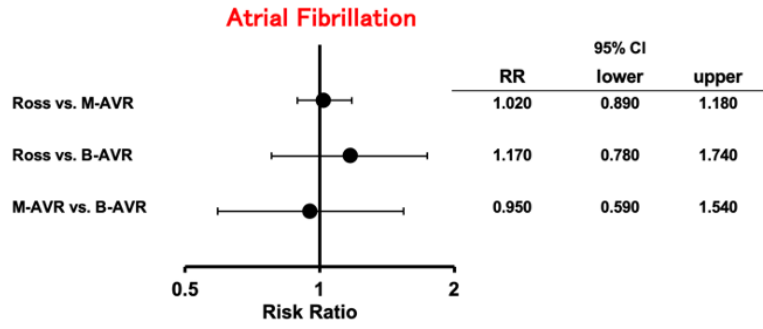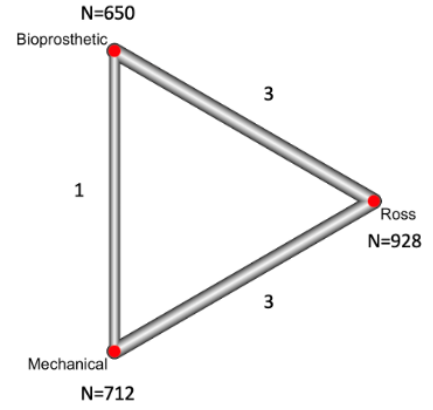

D)

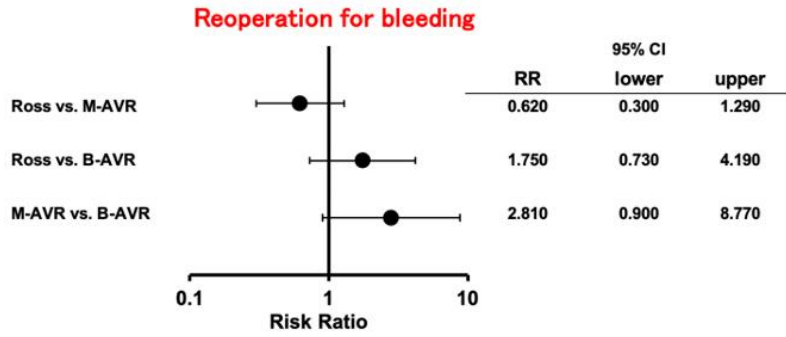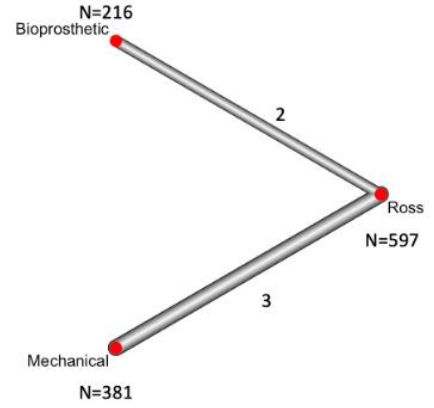

**Figure S4. Direct and indirect comparisons for A) stroke, B) myocardial infarction, C) permanent pacemaker implantation, D) new onset atrial fibrillation, E) reoperation for bleeding, F) all-cause mortality, G) reintervention, H) major bleeding, I) long-term stroke, and J) infectious endocarditis.**

A)

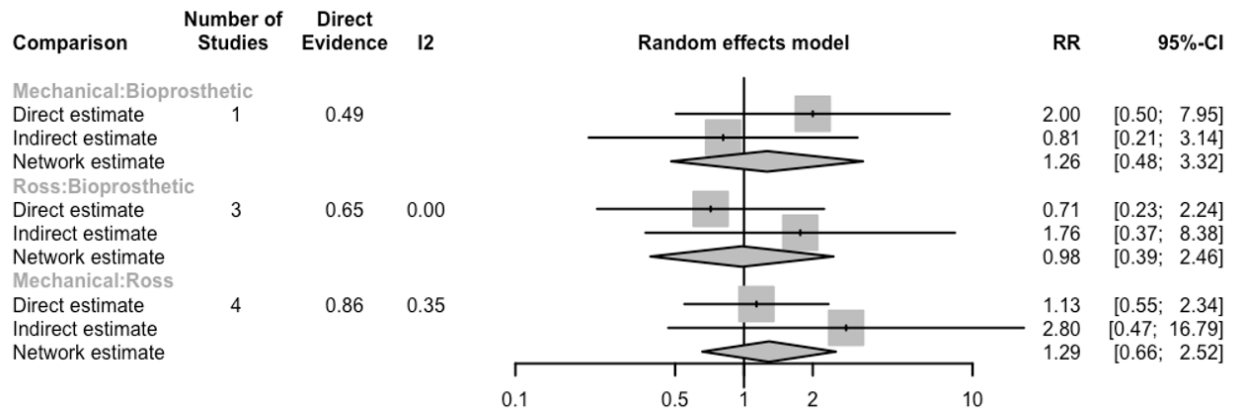

B)

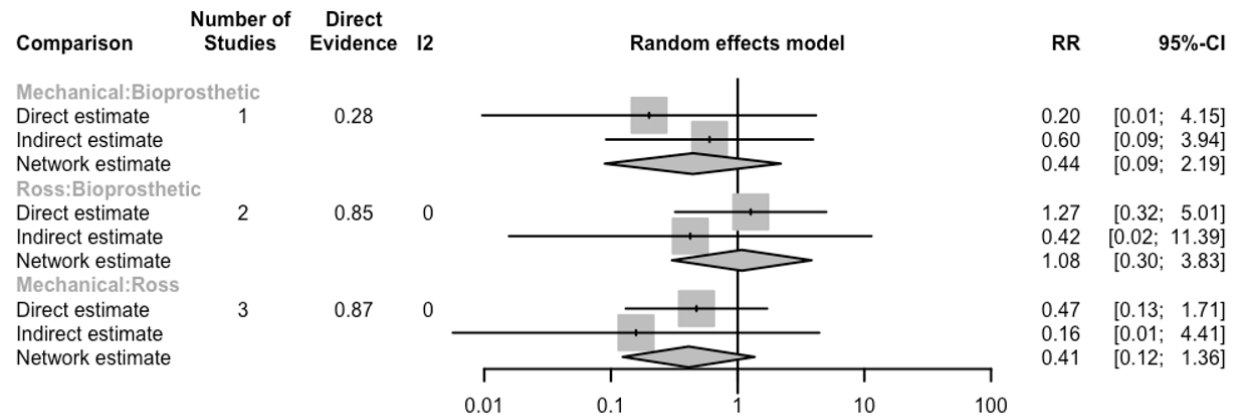

C)

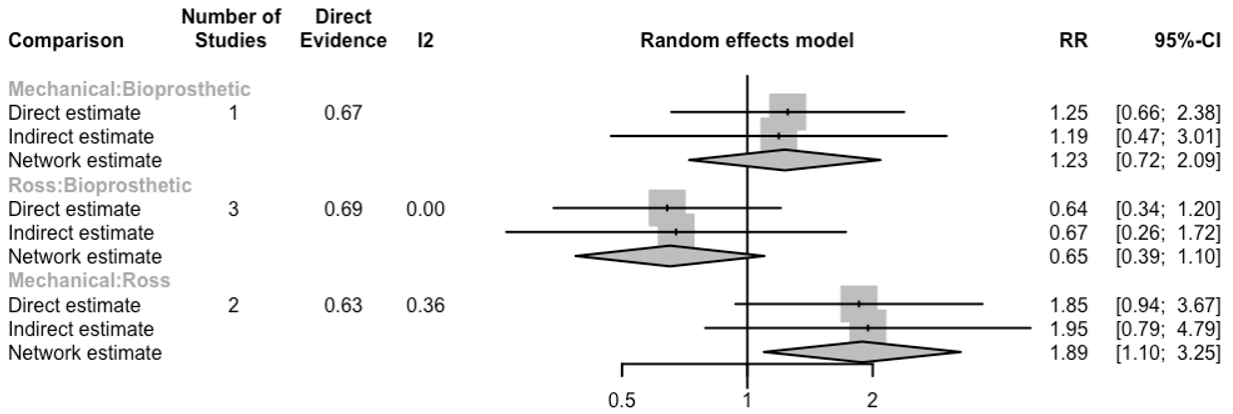

D)

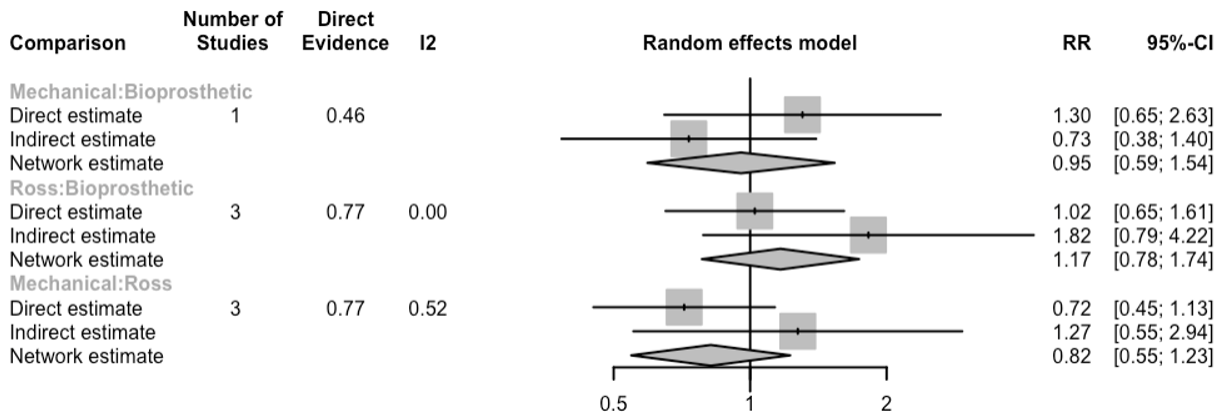

E)

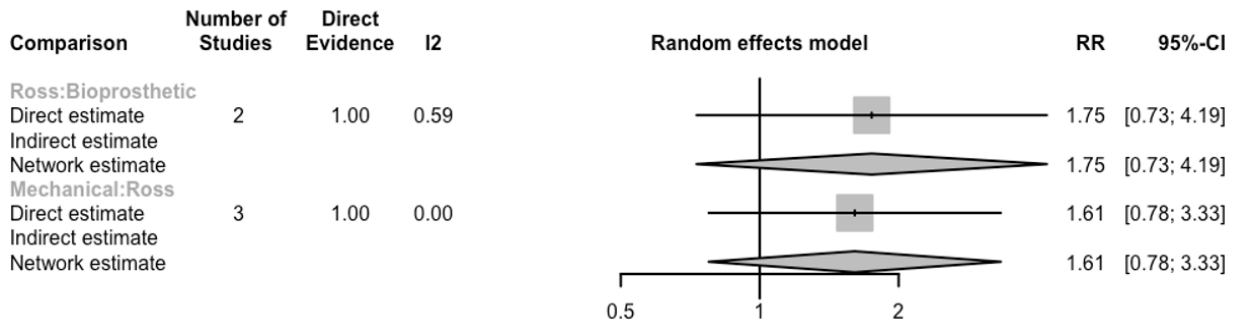

F)

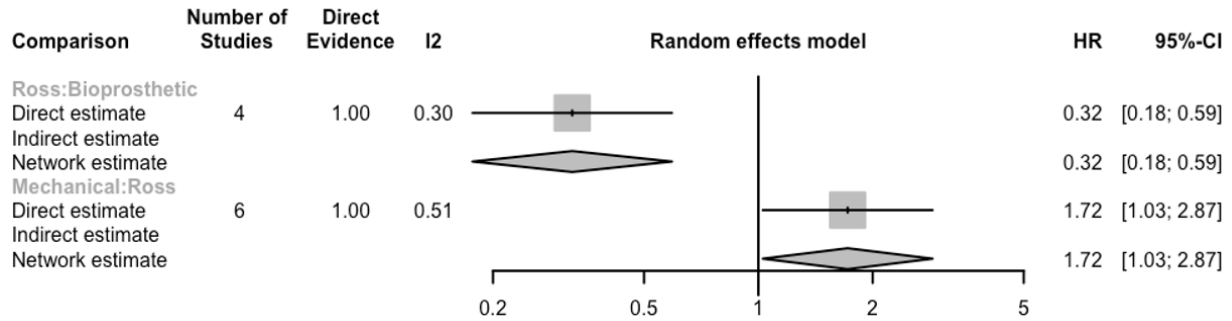

G)

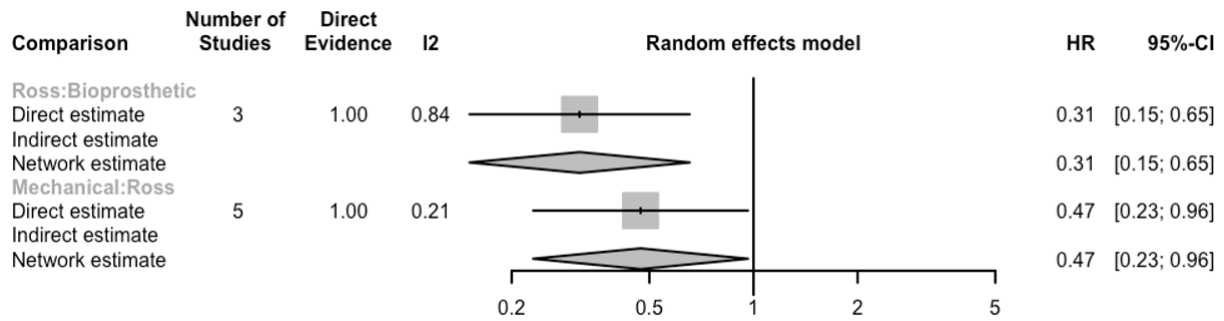

H)

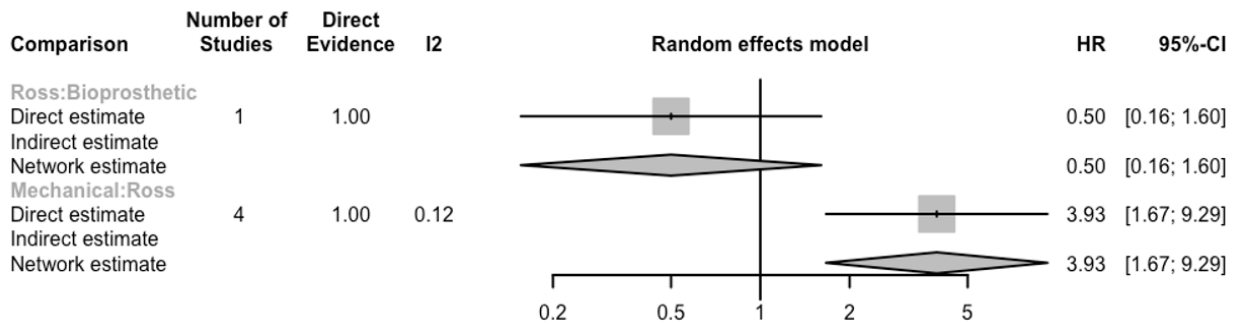

I)

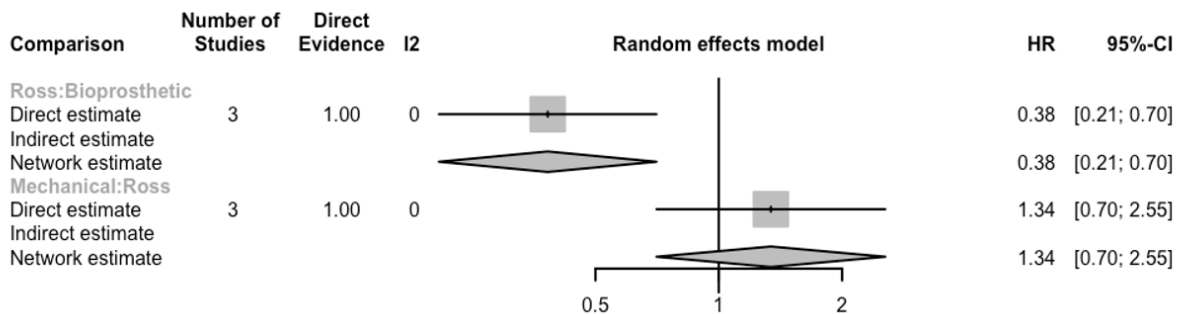

**Figure S5. P scores for short-term outcomes.**

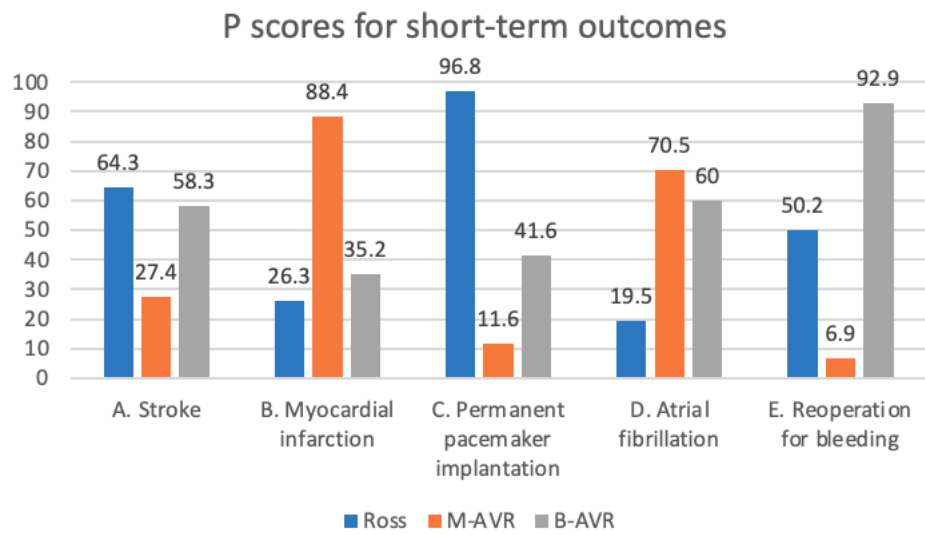

B-AVR, bioprosthetic aortic valve replacement; M-AVR, mechanical aortic valve replacement

**Figure S6. P scores for long-term outcomes.**

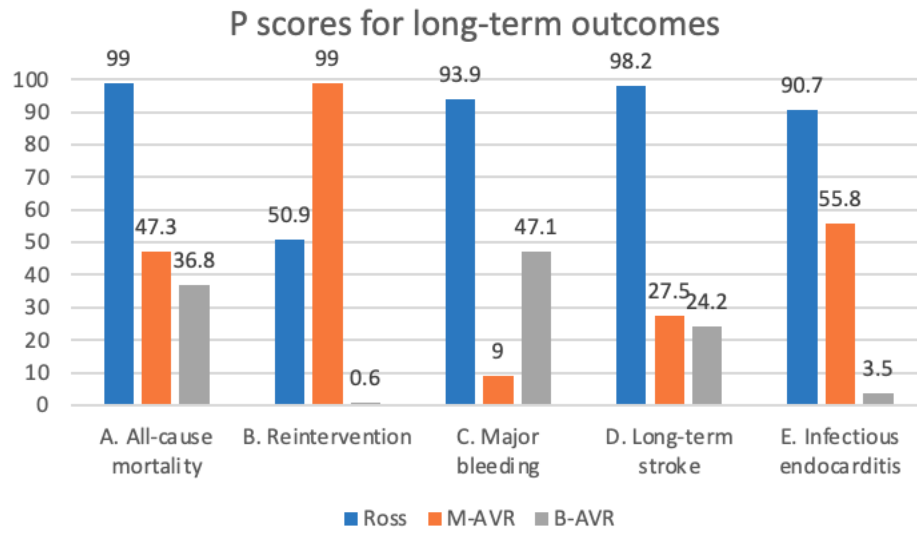

B-AVR, bioprosthetic aortic valve replacement; M-AVR, mechanical aortic valve replacement

**Figure S7. Publication bias assessment using Funnel plot for A) stroke, B) myocardial infarction, C) permanent pacemaker implantation, D) new onset atrial fibrillation, E) reoperation for bleeding, F) all-cause mortality, G) reintervention, H) major bleeding, I) long-term stroke, and J) infectious endocarditis.**

A)

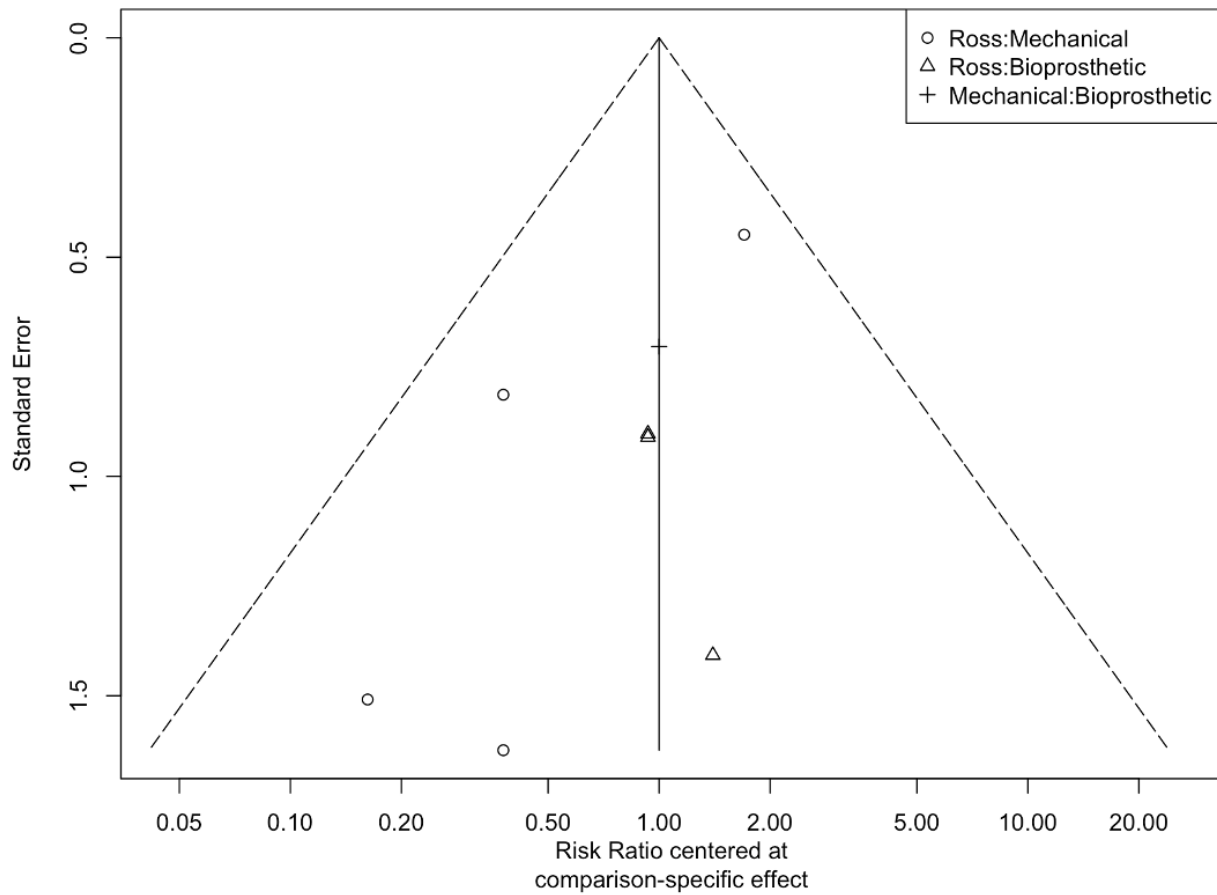

B)

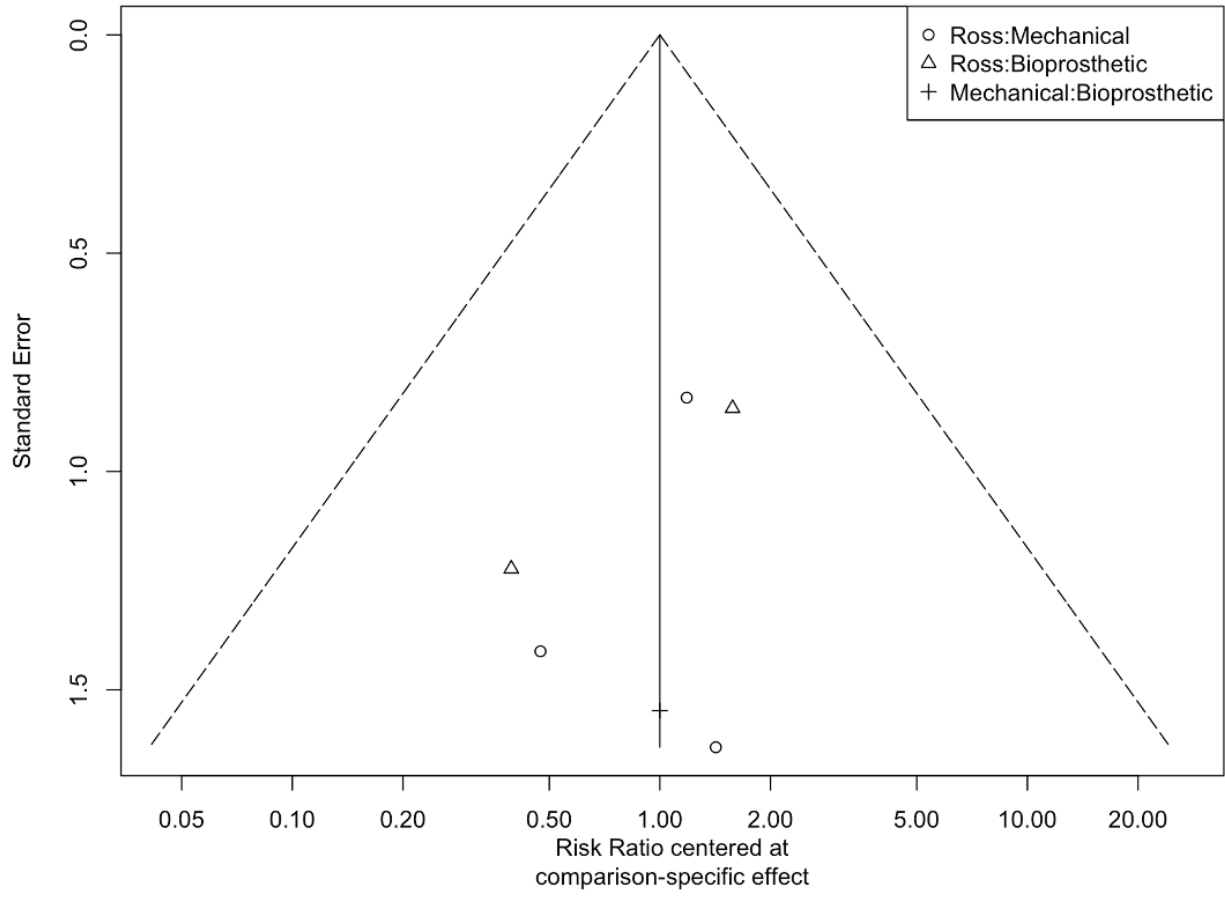

C)



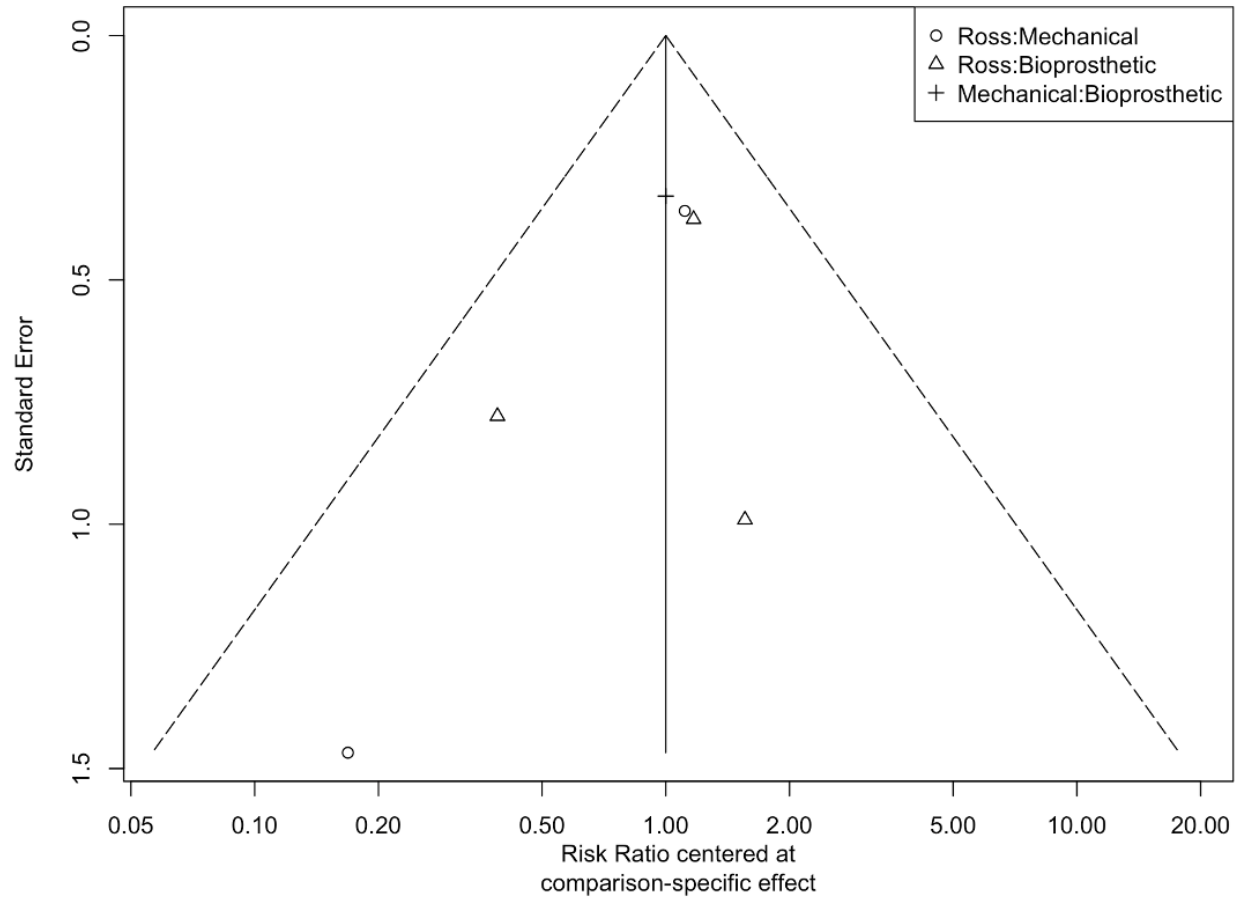

D)

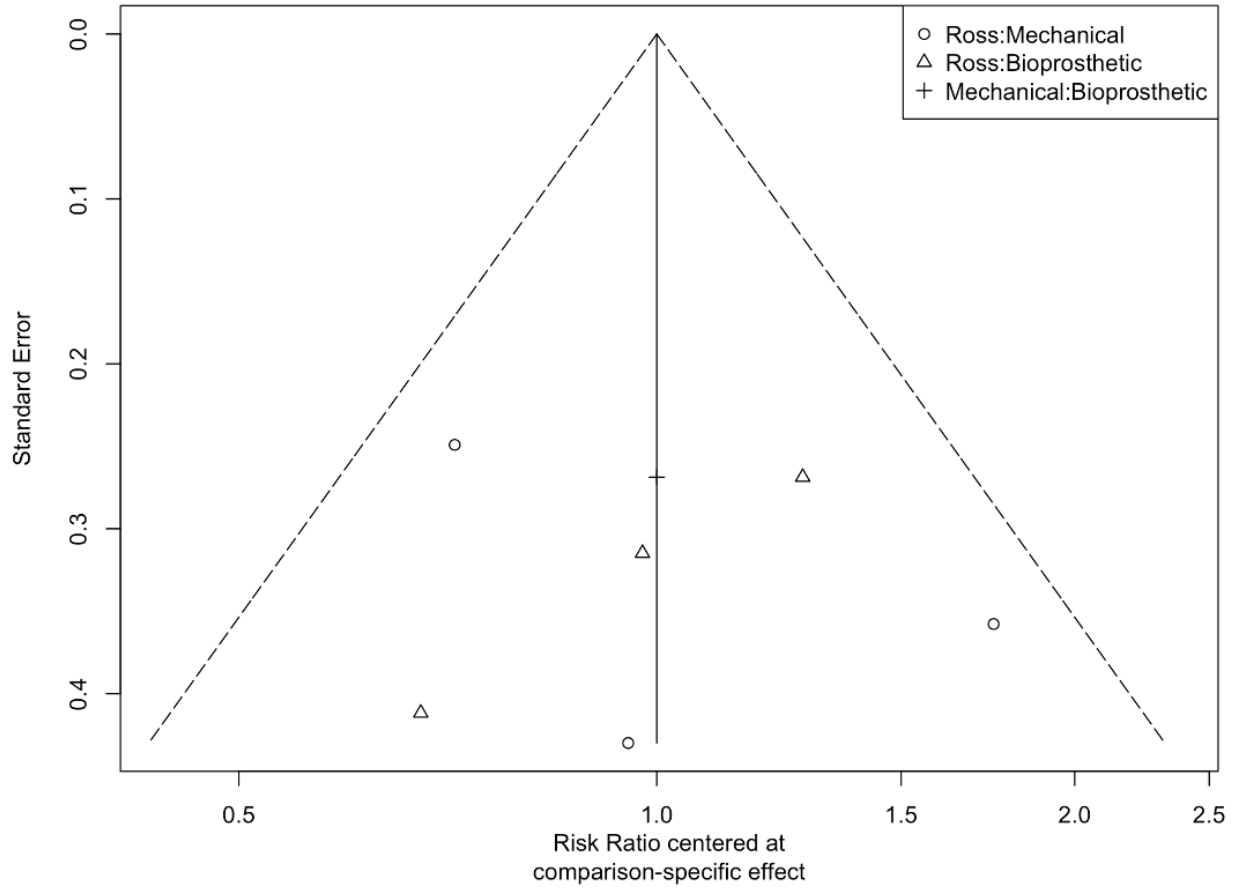

E)

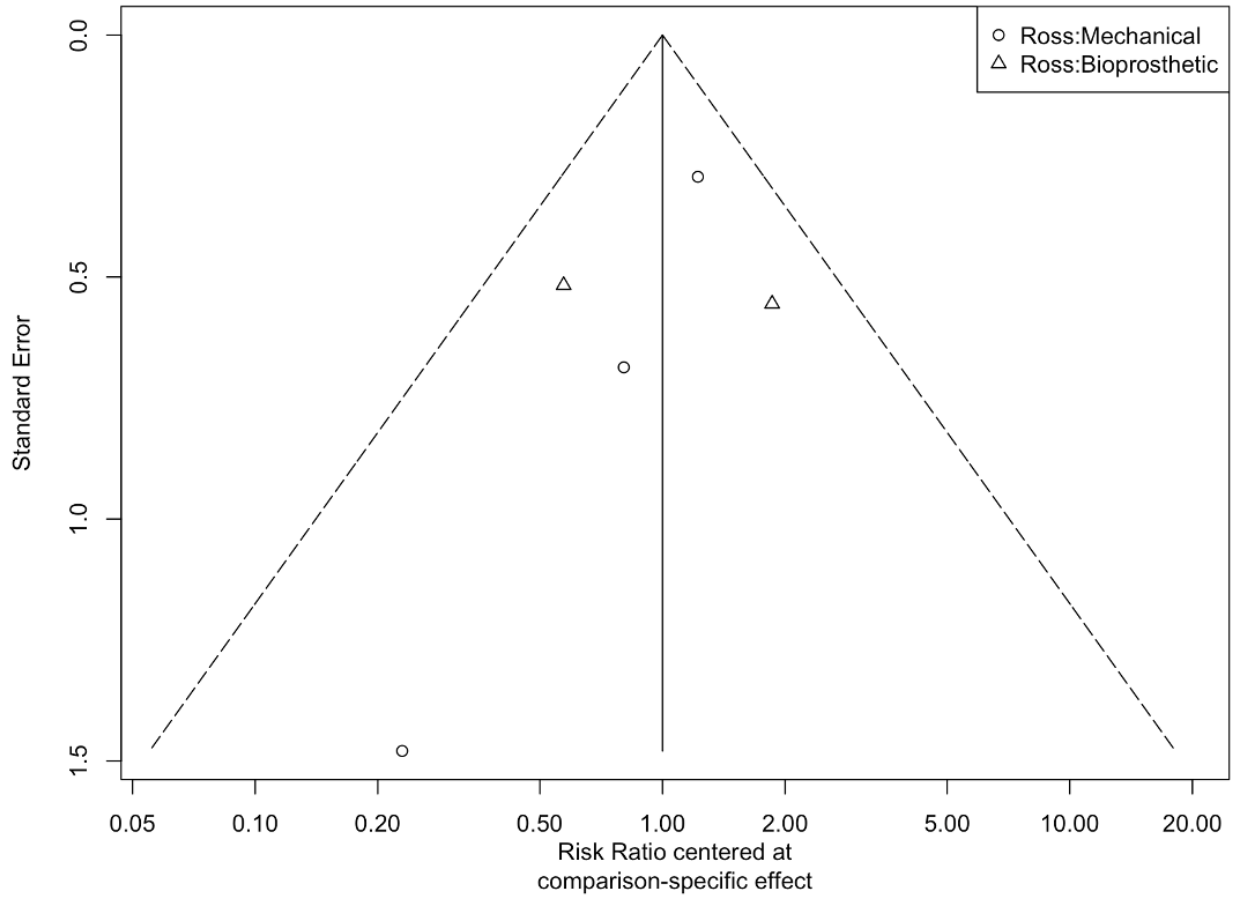

F)

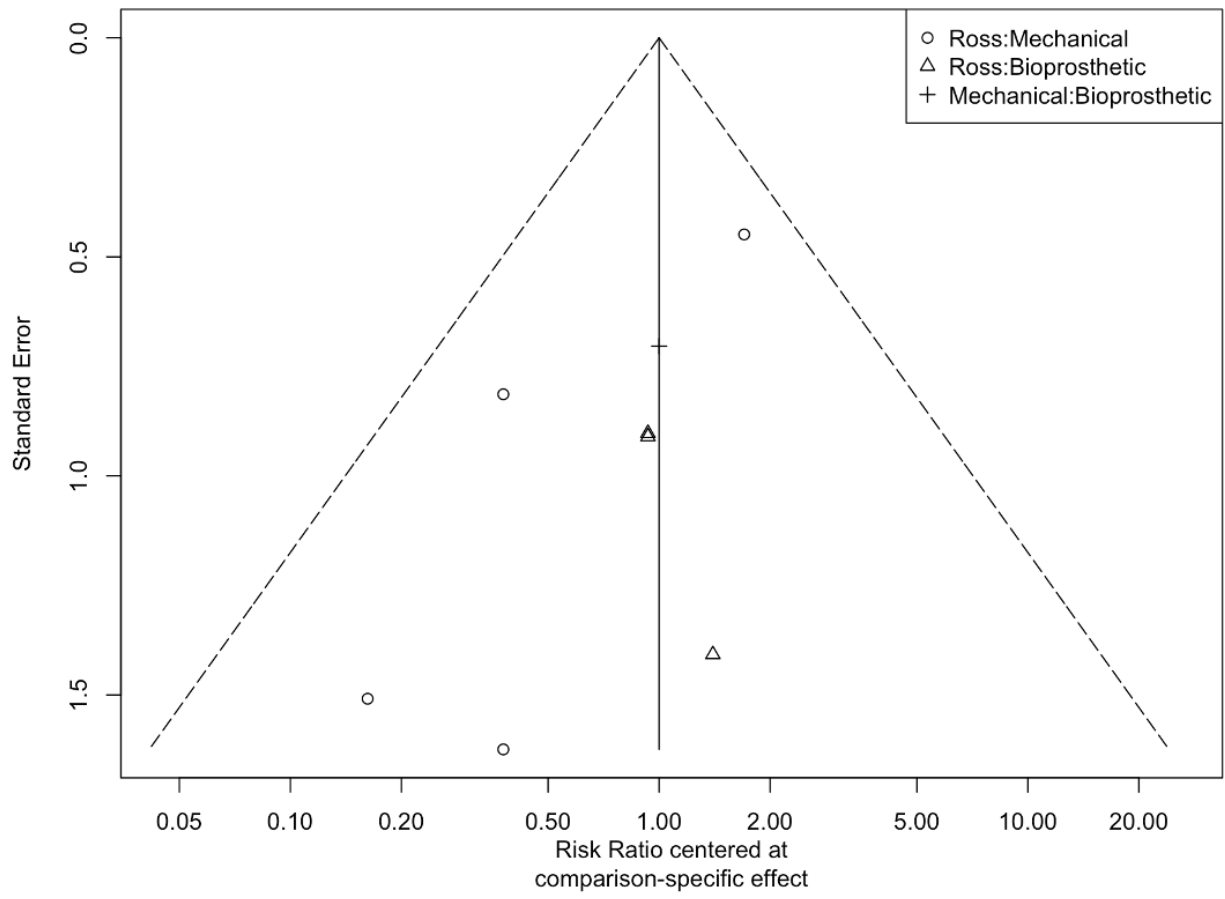

G)

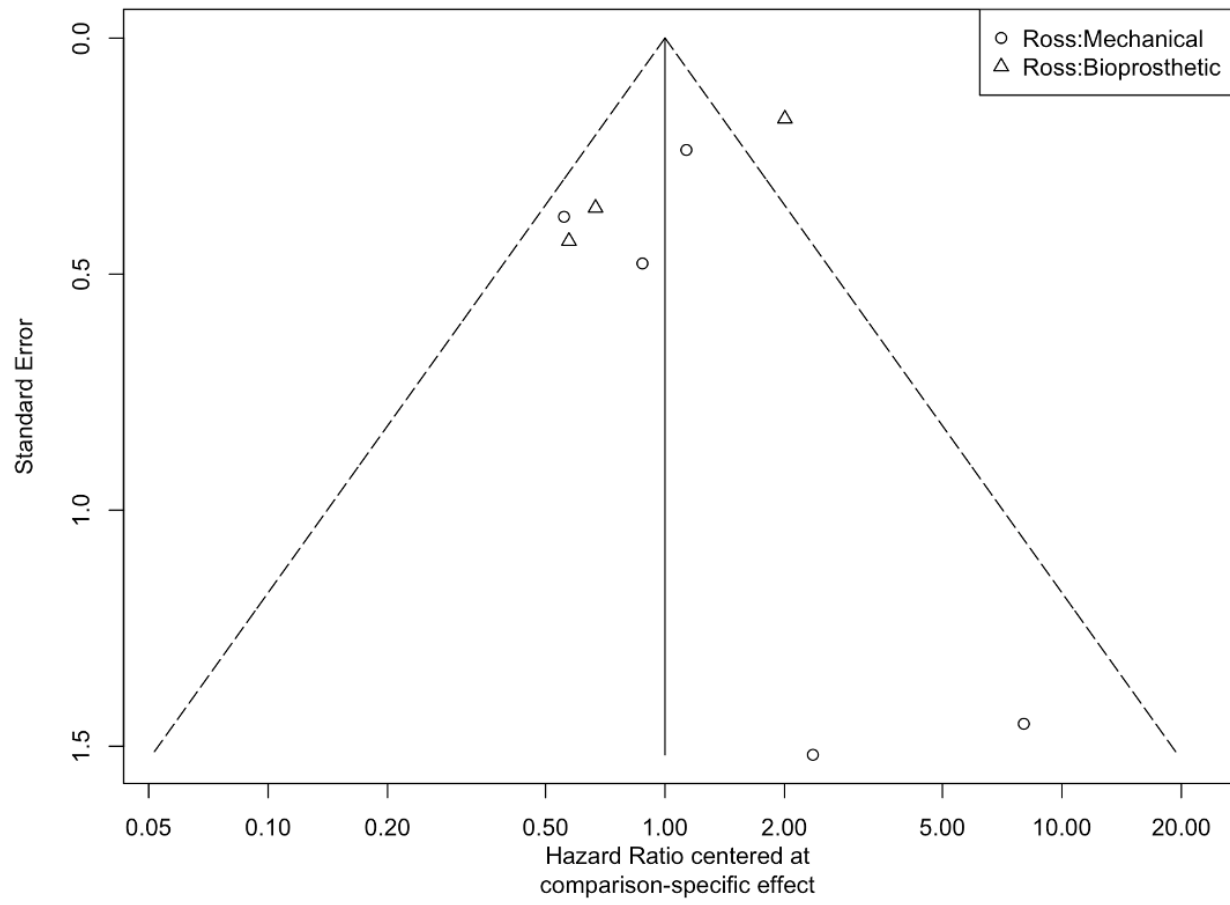

H)

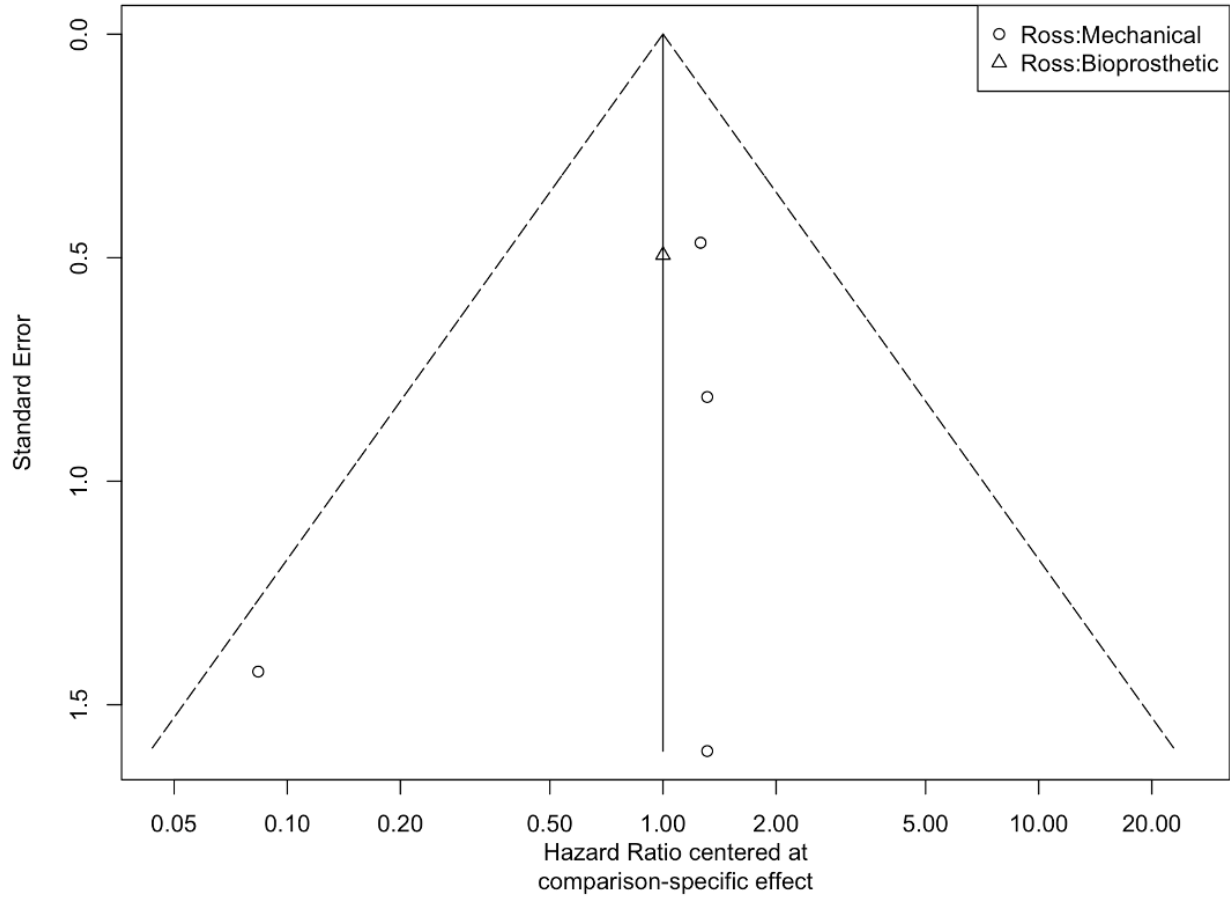

D)

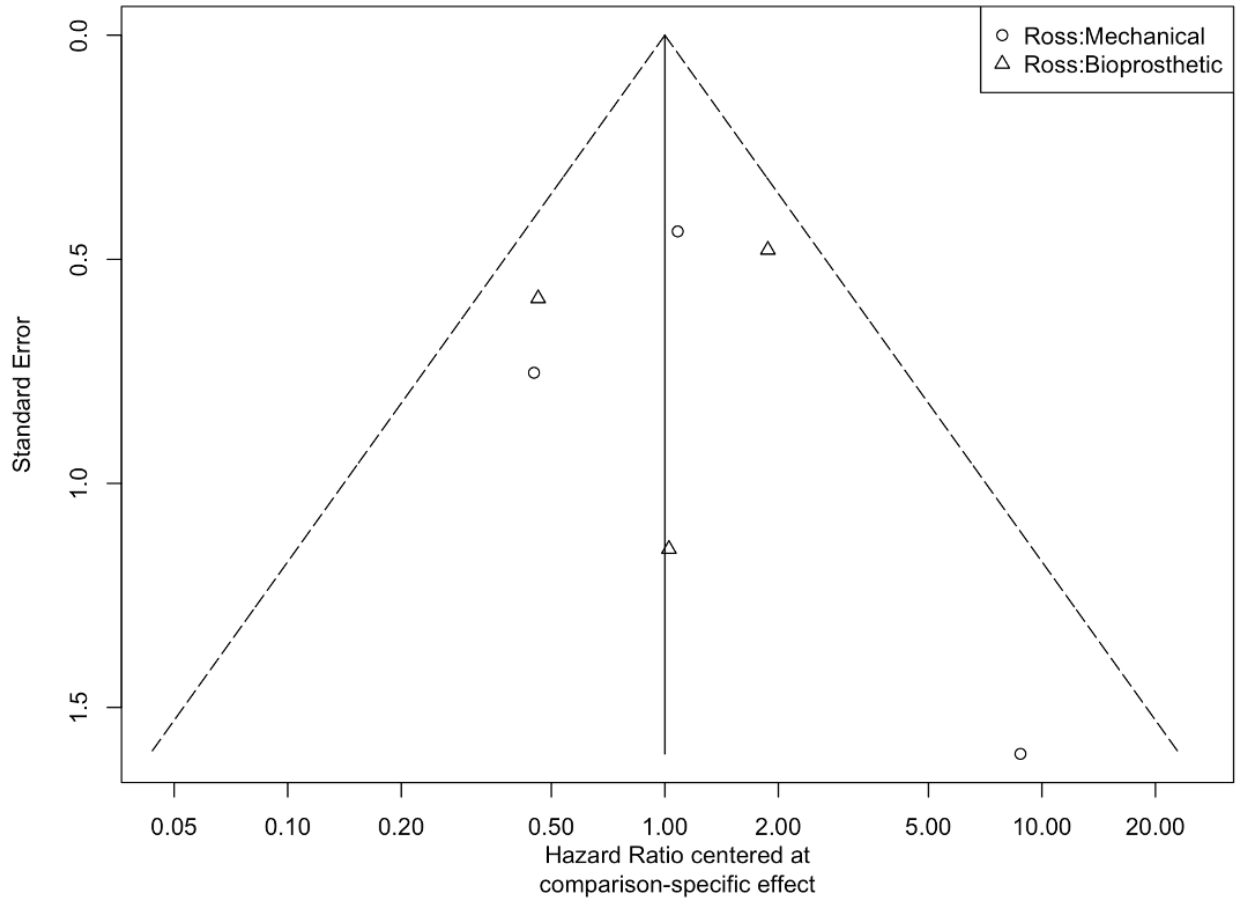

J)

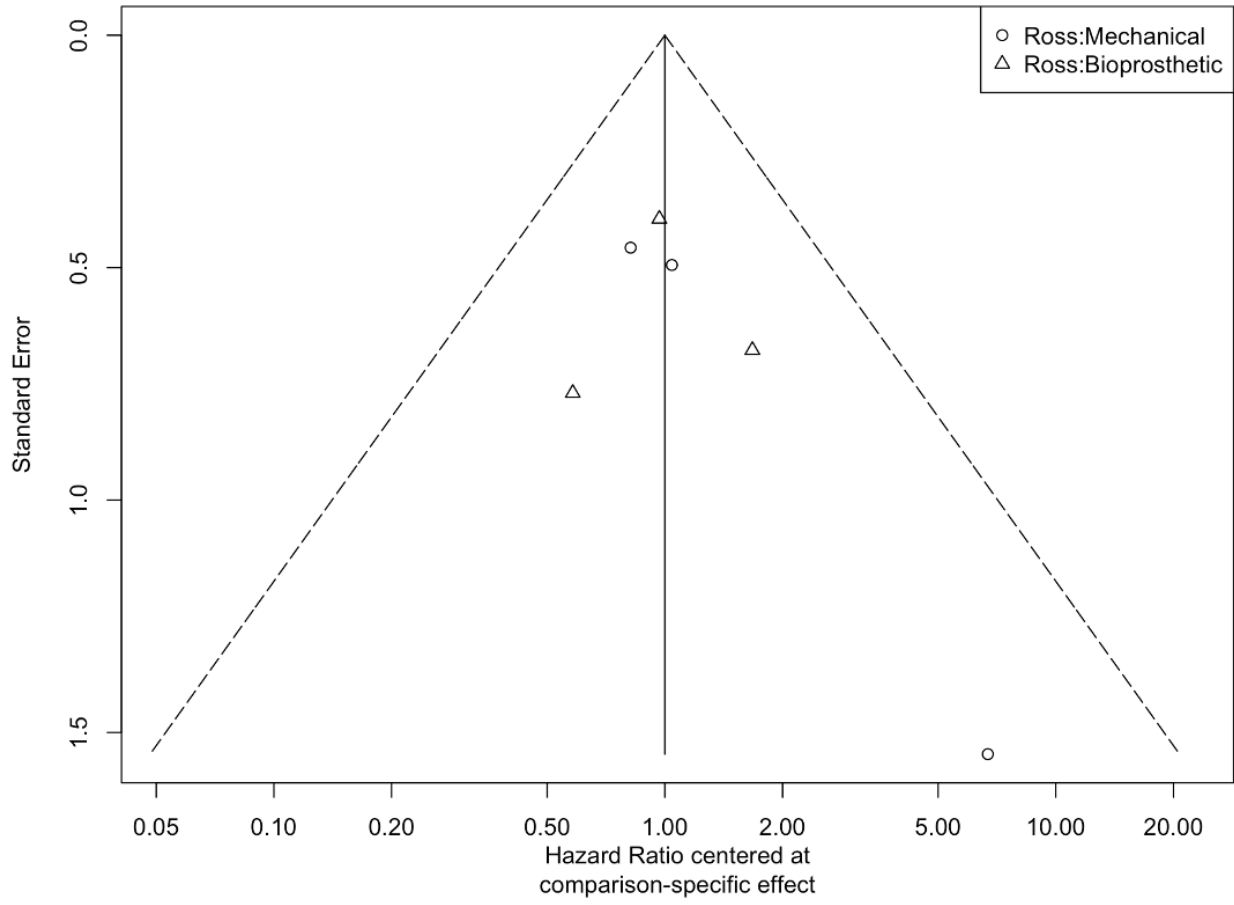

Supplement: JAH3-12-e027715-s001.pdf [file JAH3-12-e027715-s001.pdf]
